# Supplementary material
Source: Springer Nature journal article supplement (https://www.springermedizin.de/resource/supplementary/13643_2014_313_MOESM2_ESM.pdf/9681726)
Supplement: MOESM2 [file 9681726]

Study No.: “#”

Topic: “Mesh Preventive”

Data Extractor:  PP  KG  DATABASE

**Characteristics**

Title:

Author:

Pub Year:

Journal:

Language

english

other:

Trial registered

no

yes

at:

Registration number:

Study duration

from

to

not stated

Participating centres

mono-centre

multicentre (No. of centres: )

Participating Country

international:

national:

Number of treatment groups

two-arm

multi-arm (No. of arms: )

Sample size calculation

n=

Power

%

Delta

%

Analysis strategy

ITT

PP

other:

not stated

Patients total

n=

Patients evaluable

n =

Withdrawals

n =

Lost to follow up

n =

**CONFLICT OF INTEREST**

COI

stated

not stated

If stated, how was COI described?

**FUNDING**

industry  independent  not stated

Sponsor:

If industry, was it stated as COI?  no  yes

Number of authors affiliated with industry:

Type of industry support:

**INTERVENTIONS**

**Operation**

Surgical Standardization

standardized

non-standardized

not stated

Intervention performed by

trained surgeons

teaching-OP

not stated

Comparability at baseline

affirmed

not affirmed

Reason:

Study No.: “#”

Topic: “Mesh Preventive”

**OUTCOMES**

Number of outcomes

Primary:

Secondary:

Primary outcome defined

Outcome

Not-Pro

Pro

p-value of primary outcomes

Key conclusions of the study authors

Conclusions supported by data

no

yes

If “no”, state:

**RISK OF BIAS**

Stratified randomization

no

yes, strata:

Block randomization

no

yes, size of block:

not stated

Random sequence generation

computer generated random-numbers

drawing envelopes

table of random number list

non-random approach

other:

unclear

not stated

Risk:  Low

High

Unclear

Notes:

Allocation concealment

sequentially numbered, sealed, opaque envelopes

central randomisation

open random allocation schedule

alternation or rotation

other:

unclear

not stated

Risk:  Low

High

Unclear

Notes:

Blinding (I)

Patients

Practitioners

Data collectors

not stated

Risk:  Low

High

Unclear

Notes:

**Study No.:** “#”

**Topic:** “Mesh Preventive”

**Blinding (II)**

- Outcome assessors
- Data analysts
- not stated

Risk:  Low       High       Unclear  
Notes:

**Incomplete outcome data**

- no
- yes
- not stated

Risk:  Low       High       Unclear  
Notes:

**Selective reporting**

- no
- yes
- not stated

Risk:  Low       High       Unclear  
Notes:

**Other bias**

- no
- yes
- not stated

Description:

Risk:  Low       High       Unclear  
Notes:

**Important notes:**

**Date:** .....

**Signature:** .....
